# Supplementary material for: Superconductivity in bilayer graphene intercalated with alkali and alkaline earth metals
Source: Royal Society of Chemistry journal article supplement (doi:10.1039/c9cp00176j), 2019-01-01
Supplement: c9cp00176j1.pdf [file c9cp00176j1.pdf]

## SUPPLEMENTARY INFORMATION

### Superconductivity in bilayer graphene intercalated by alkali and alkaline earth metals

Artur P. Durajski,<sup>1,\*</sup> Kamil M. Skoczylas,<sup>2</sup> and Radosław Szczęśniak<sup>1</sup>

<sup>1</sup>*Institute of Physics, Częstochowa University of Technology,  
Ave. Armii Krajowej 19, 42-200 Częstochowa, Poland*

<sup>2</sup>*Institute of Physics, Jan Długosz University in Częstochowa,  
Ave. Armii Krajowej 13/15, 42-200 Częstochowa, Poland*

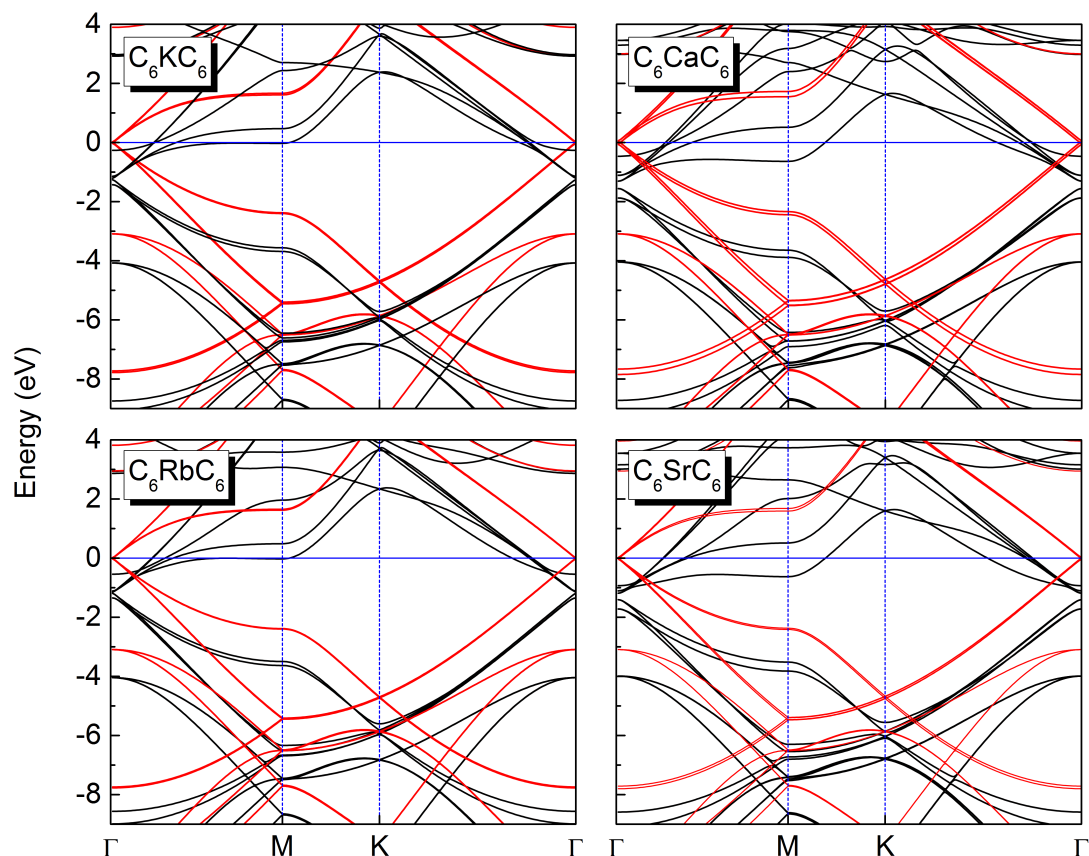

Fig. S1: Electronic band structures of the  $C_6KC_6$ ,  $C_6CaC_6$ ,  $C_6RbC_6$  and  $C_6SrC_6$  (black lines) and pristine bilayer graphene (red lines) along the  $\Gamma$ -M-K- $\Gamma$  high-symmetry path through the Brillouin zone. The bilayers are kept at the same distances even in the absence of intercalants. The Fermi level is set to be zero.

\*Electronic address: [adurajski@wip.pcz.pl](mailto:adurajski@wip.pcz.pl)

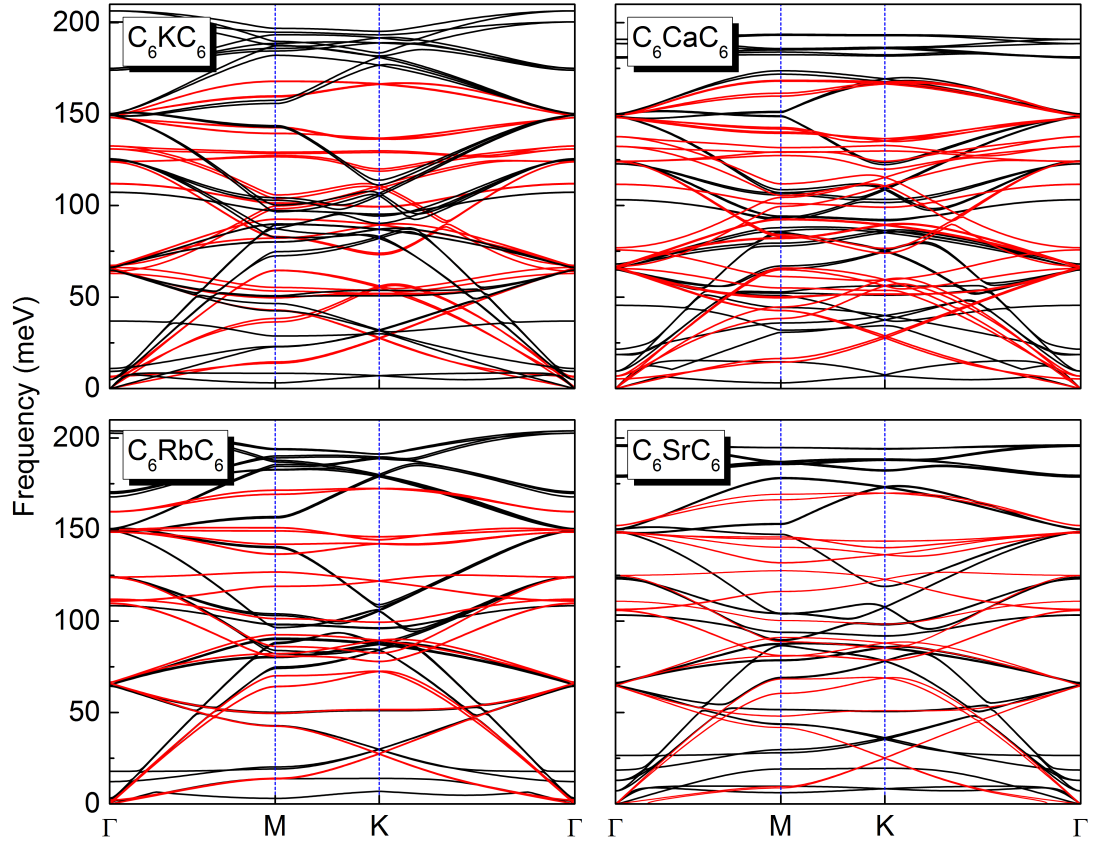

Fig. S2: Phonon dispersion curves along the high-symmetry directions of the Brillouin zone of the  $C_6KC_6$ ,  $C_6CaC_6$ ,  $C_6RbC_6$  and  $C_6SrC_6$  (black lines) and pristine bilayer graphene (red lines). The bilayers are kept at the same distances even in the absence of intercalants.
